1           **The River Runs Through It: the Athabasca River Delivers Mercury to**  
2                           **Aquatic Birds Breeding Far Downstream**

3

4   Short Title: Athabasca River Delivers Mercury Far Downstream

5

6   **Craig E. Hebert\***

7   Environment and Climate Change Canada, Science and Technology Branch, National Wildlife

8   Research Centre, Ottawa, ON, Canada. Phone 613-998-6693, fax 613-998-0458,

9   craig.hebert@canada.ca

10   \* Corresponding author

11

12   **Keywords:** oil sands, mercury, aquatic birds, Athabasca River, Peace-Athabasca Delta

13

14

15

16

17

18

19

20

21

22

23

24

## 25 **Abstract**

26 This study examined factors contributing to temporal variability (2009-2017) in total mercury  
27 (THg) concentrations in aquatic bird eggs collected in the Peace-Athabasca Delta and Lake  
28 Athabasca in northern Alberta. Factors examined included annual changes in oil sands  
29 production, bird diets, forest fires, and flow of the Athabasca River. Surface mining activities  
30 associated with Alberta's Athabasca oil sands are centered north of Fort McMurray, Alberta,  
31 adjacent to the northward-flowing Athabasca River. Previous studies have found that oil sands  
32 industrial operations release mercury into the local (within ~50 km) environment. However,  
33 temporal trends in egg THg levels did not track trends in synthetic oil production from the oil  
34 sands. Intraspecific fluctuations in bird diet also could not explain annual variability in egg THg  
35 levels. Annual extent of forest fires in Alberta was only related to egg THg concentrations in  
36 California Gulls from Lake Athabasca; annual levels in other species showed no relationship  
37 with fire extent. The inclusion of more terrestrial foods in gull diets may have contributed to this  
38 difference. For the majority of species, annual fluctuations in maximal flow of the Athabasca  
39 River were important in influencing annual egg THg levels. Eggs collected following years of  
40 high flow had higher THg concentrations with distinct stable Hg isotope compositions. Riverine  
41 processes associated with suspended sediment were likely critical in regulating Hg availability to  
42 nesting birds. This study highlights the importance of the Athabasca River as a conduit for Hg  
43 transport to ecologically-sensitive downstream ecosystems such as the Peace-Athabasca Delta  
44 and Wood Buffalo National Park (a UNESCO World Heritage Site). Human activities that  
45 increase atmospheric Hg deposition to the Athabasca River watershed, or that enhance Hg  
46 releases to the river through erosion of Hg-bearing soils, will likely increase the availability of  
47 Hg to organisms inhabiting downstream areas.

## 48 **Introduction**

49           The Athabasca River is a major river flowing northeast 1200 km from the Rocky  
50 Mountains to Lake Athabasca. Along the way, it passes through Alberta's oil sands, a region of  
51 large-scale, open-pit mines used to extract bitumen for synthetic oil production. The river  
52 discharges into the Peace-Athabasca Delta (PAD) and western Lake Athabasca approximately  
53 200 km downstream of Fort McMurray (see [1]). Since 1967, when oil sands operations  
54 commenced, industrial exploitation of the bitumen-rich oil sands has expanded greatly [2] (Fig.  
55 S1). Previous research has indicated that industrial development associated with the oil sands is a  
56 source of mercury (Hg) to the environment [3, 4]. For example, Kirk et al. [4] found that  
57 deposition of both total mercury (THg) and methyl mercury (MeHg) in snow resembled a  
58 bullseye pattern with higher Hg levels in snow collected closer to oil sands developments.  
59 However, snow Hg levels declined rapidly with distance from such developments with most Hg  
60 being deposited within approximately 50 km. These studies [3, 4] highlighted the possibility that  
61 spring snowmelt could result in the release of chemicals, such as Hg, into the aquatic  
62 environment. Similarities in relative concentrations of metals in snow and river water provided  
63 evidence of metals emitted to the air finding their way into the Athabasca River and tributaries  
64 [3]. Kelly et al. [3] also found that Hg concentrations in water were greatest downstream of  
65 areas disturbed by oil sands development. Passage of water through the surface-mineable oil  
66 sands region, in itself, was not responsible for elevated water Hg levels. Degree of land  
67 disturbance caused by oil sands operations was important in enhancing water Hg concentrations.  
68 The significance of these findings in terms of effects on Hg concentrations in biota inhabiting  
69 areas farther downstream, e.g. the PAD, has not been documented and deserves further study.

70 The PAD is a wetland of international significance [5] and it is a defining feature of  
71 Wood Buffalo National Park (WBNP), a UNESCO World Heritage Site. It provides habitat for  
72 millions of birds and WBNP is the only breeding area for the endangered Whooping Crane (*Grus*  
73 *americana*) [6]. The surrounding region also provides important wildlife habitat. For example,  
74 Egg Island in western Lake Athabasca is a provincial ecological reserve harboring a variety of  
75 colonially-nesting aquatic birds including the largest breeding colony of Caspian Terns  
76 (*Hydroprogne caspia*) in Alberta [7]. The PAD and Lake Athabasca are also important to  
77 Indigenous land users who rely on traditional wild foods [8]. Hence, environmental changes  
78 brought about by human activities have the potential to significantly affect wildlife and human  
79 inhabitants of this region.

80 Colonial aquatic birds, e.g. gulls and terns, are commonly used to monitor the state of the  
81 environment [9]. These birds are top predators resulting in their accumulation of high levels of  
82 biomagnifying contaminants. Eggs are a useful sampling matrix for contaminant studies as their  
83 collection has little impact on bird populations and eggs of these species are formed from  
84 exogenous, locally-obtained resources [10]. Since 2009, gull and tern eggs have been collected  
85 annually from sites in WBNP (Mamawi Lake) and western Lake Athabasca (Egg Island). The  
86 goal of this study was to examine temporal trends (2009-2017) in egg THg levels and determine  
87 whether they were influenced by a variety of factors including: oil sands production, bird diet,  
88 forest fires, and flow of the Athabasca River. We briefly discuss each of these factors below.

89 From 2009-2016, oil production from surface mineable sources in the Athabasca oil  
90 sands increased by 47% (761,000 bpd (barrels per day) to 1,117,000 bpd) and accounted for  
91 approximately 46% of total oil sands production in 2016 (in-situ production accounted for the  
92 remainder) [2]. As oil sands operations are a known source of Hg [3, 4], it is plausible that

93 increases in oil/bitumen production might be accompanied by increases in Hg releases to the  
94 environment that could result in increased Hg levels in wildlife receptors such as bird eggs.  
95 Because MeHg biomagnifies, it is possible that annual changes in bird diets, particularly with  
96 respect to bird trophic position, could be important in regulating annual egg THg concentrations.  
97 Inter-specific differences in food sources could also be important in regulating Hg exposure.  
98 Forest fires are known to release Hg into the environment [11, 12] and Alberta experienced very  
99 large forest fires in some years during the study period [13]. It is possible that such fires could  
100 increase Hg levels in the food webs used by birds with resultant increases in egg THg  
101 concentrations. Previous research on aquatic birds has highlighted the possibility that the  
102 Athabasca River may be a source of Hg to wildlife inhabiting downstream environments [14]. In  
103 a large-scale spatial assessment of Hg levels in western Canadian gull eggs, Dolgova et al. [15]  
104 found that levels were greatest in eggs collected from breeding sites in receiving waters of the  
105 Athabasca River. Hence, factors associated with the regulation of Hg transport via the Athabasca  
106 River may be important in regulating Hg levels in downstream wildlife. One such critical factor  
107 is annual maximal river flow. Long and Pavelsky [16] documented the influence of river flow on  
108 sediment transport down the Athabasca River into the PAD and Lake Athabasca. In the river,  
109 there was a linear relationship between flow and suspended sediment concentrations (SSC) with  
110 SSC notably increasing around flows of 1500 m<sup>3</sup>/s. In addition, a non-linear relationship between  
111 river flow and downstream SSC in western Lake Athabasca was observed after maximal flow  
112 exceeded a threshold of 1700 m<sup>3</sup>/s. Riverine transport of sediment-bound Hg is an important  
113 mechanism for the transfer of that element to downstream environments [17]. SSC may also  
114 influence Hg dynamics in the environment through effects on the photochemical reduction of  
115 MeHg. These effects, and possible Hg sources, can be evaluated using Hg stable isotopes.

116 Mass-dependent (MDF) and mass-independent (MIF) fractionation of stable Hg isotopes  
117 ( $^{196}\text{Hg}$ ,  $^{198}\text{Hg}$ ,  $^{199}\text{Hg}$ ,  $^{200}\text{Hg}$ ,  $^{201}\text{Hg}$ ,  $^{202}\text{Hg}$ ,  $^{204}\text{Hg}$ ) can provide insights into processes regulating  
118 Hg dynamics in the environment. MDF, e.g.  $\delta^{202}\text{Hg}$ , is influenced by a variety of factors  
119 including physical processes as well as by biological reactions [18] and can be useful in  
120 identifying the flow of mercury from terrestrial and aquatic systems to consumers [19]. MIF, on  
121 the other hand, has largely been documented for the odd mass Hg isotopes ( $^{199}\text{Hg}$ ,  $^{201}\text{Hg}$ ) and is  
122 thought to primarily be the result of a magnetic isotope effect, i.e. dissimilarities in magnetic spin  
123 of even and odd mass isotopes result in their reacting at different rates. Existing evidence  
124 suggests that MIF is not influenced by food web/trophic interactions [20] but occurs during  
125 photochemical MeHg degradation and photoreduction of  $\text{Hg}^{2+}$  [21]. Therefore, factors that affect  
126 Hg exposure to light, e.g. light penetration through the water column, are expected to influence  
127 MIF of Hg isotopes [22]. Photodegradation of MeHg to  $\text{Hg}^0$  may be an important MeHg  
128 removal mechanism, particularly in systems characterized by clear water with a high degree of  
129 light penetration, and this can be assessed using Hg isotopes [23]. However, only a portion of the  
130 MeHg in such systems will undergo photochemical demethylation. The remaining MeHg will  
131 exhibit MIF of  $^{199}\text{Hg}$  and  $^{201}\text{Hg}$  and that MeHg may be incorporated into food webs with Hg  
132 isotope values in consumers (e.g. birds) reflecting MIF of Hg isotopes [23].

133 The slope of the MIF of  $^{201}\text{Hg}$  versus  $^{199}\text{Hg}$  is useful in differentiating the Hg species  
134 (MeHg or  $\text{Hg}^{2+}$ ) undergoing photoreduction (MeHg slope  $\sim 1.3$ ,  $\text{Hg}^{2+}$  slope  $\sim 1.0$ ) [21, 23, 24]. A  
135 slope near 1.3 indicates that photoreduction of MeHg is the main mechanism underlying MIF  
136 values. If photochemical reduction of MeHg is the main process underlying MIF of Hg isotopes  
137 then  $\Delta^{199}\text{Hg}$  and/or  $\Delta^{201}\text{Hg}$  values in consumer tissues can be used to estimate the amount of  
138 MeHg that has been photodegraded [21, 25].

139           In this study, annual THg levels in eggs of aquatic birds nesting downstream of the  
140 Athabasca River are assessed. As described above, various factors, i.e. oil sands production, bird  
141 diet, forest fires, and riverine processes, are investigated to determine the degree to which they  
142 explain patterns in annual egg THg concentrations. As part of this analysis, the degree to which  
143 maximal annual flow of the Athabasca River and concomitant changes in SSC are important in  
144 regulating Hg availability to birds is investigated. Mercury isotopes are used to gain insights into  
145 the processes regulating Hg dynamics and availability in this ecosystem.

146

## 147 **Methods**

### 148 **Field Methods**

149           Aquatic bird, i.e. gull and tern, egg collections were made in June, 2009-2017 (no  
150 collections were made in 2010) at two sites located in receiving waters of the Athabasca River.  
151 Mamawi Lake (58.60N, -111.47W) is located in the Peace-Athabasca Delta within the  
152 boundaries of Wood Buffalo National Park. Egg Island (59.98N, -110.44W) is located in the  
153 western end of Lake Athabasca approximately 40 km northeast of the mouth of the Athabasca  
154 River (see Dolgova et al. [15] for map showing collection locations). In most years, 10 eggs were  
155 collected per species per site. At Mamawi Lake, Ring-billed Gull (*Larus delawarensis*) and  
156 Common Tern (*Sterna hirundo*) eggs were collected. Low water levels in 2011 prevented  
157 access to that location so no eggs were collected that year. Also, in 2014 it was impossible to  
158 collect Common Tern eggs at that site. At Egg Island, 10 eggs were collected annually from  
159 three species: California Gull (*Larus californicus*), Caspian Tern, and Common Tern. The first  
160 recorded nesting of Common Terns on Egg Island was in 2011 so eggs of that species were not

161 collected from that site in 2009. Eggs were transported to the National Wildlife Research  
162 Centre, Ottawa, ON, Canada in padded cases.

163 In 2013, prey fish, i.e. cyprinids, were collected from Mamawi Lake and two sites in  
164 western Lake Athabasca to provide isotope data for bird prey. Whole-body fish were analyzed of  
165 two surface-schooling species: Spottail Shiner (*Notropis hudsonius*) and Emerald Shiner (*N.*  
166 *atherinoides*). These species are accessible to surface-feeding birds. Details regarding prey fish  
167 collections are available in Dolgova et al. [15].

168 Epiphytic lichen was collected from the branches of coniferous tree species in 2013 (May  
169 or July) from 14 locations north, south, east and west of Fort McMurray. All sites were within  
170 100 km of that city. Samples (n=26, two samples per site except at two sites where only one  
171 sample was analyzed) were cleaned by removing foreign debris, freeze dried, and pulverized into  
172 a fine powder before analysis. The utility of tree lichens as passive collectors of atmospheric  
173 pollutants, including mercury, has been demonstrated [26, 27]. Mercury isotope measurements in  
174 lichens were used to establish baseline Hg isotopic “signatures” associated with atmospherically  
175 deposited mercury in the Fort McMurray region. This would include mercury from all sources to  
176 that region including the oil sands.

177

## 178 Laboratory Methods

179 Egg contents (i.e. yolk, albumen, embryonic tissue) and whole-body prey fish were  
180 homogenized/pulverized using liquid nitrogen and a cryogenic ball-mill. Homogenates were  
181 aliquoted into acid-washed glass and polypropylene containers and stored at -40° C prior to  
182 analysis.



183 Details regarding egg THg analysis are identical to those reported in Hebert and Popp  
184 [28]. In eggs, approximately 97% of THg is in the organic MeHg form [29] so measuring THg is  
185 a cost-effective way to assess MeHg levels in eggs. THg concentrations measured in all samples  
186 were within concentration ranges of certified reference materials (OT1566b, TORT-3, DOLT-4,  
187 IAEA-407, BCR-463). Limit of detection for THg was 0.006 µg/g (dry weight).

188 Stable isotopes of nitrogen ( $^{15}\text{N}$  and  $^{14}\text{N}$  expressed as  $\delta^{15}\text{N}$ ) and carbon ( $^{13}\text{C}$  and  $^{12}\text{C}$   
189 expressed as  $\delta^{13}\text{C}$ ) were measured in prey fish (collected in 2013) and in the contents of  
190 individual eggs (all years) to assess bird diets across years. Details regarding stable isotope  
191 analysis are identical to those reported in Hebert and Popp [28]. Dietary change affecting the  
192 trophic position of laying females is reflected in egg  $\delta^{15}\text{N}$  values (‰) as nitrogen isotopes  
193 undergo MDF. MDF leads to enrichment of  $^{15}\text{N}$  in higher trophic level organisms with  
194 increasing  $\delta^{15}\text{N}$  values with increasing trophic position. Because Hg biomagnifies, temporal  
195 changes in trophic position would be expected to affect female exposure to, and uptake of, MeHg  
196 with concomitant effects on egg THg levels. Carbon isotopes are useful in evaluating carbon  
197 sources utilized by consumers [30]. Because lipid content of samples can affect  $\delta^{13}\text{C}$  values, a  
198 mathematical approach was used to adjust  $\delta^{13}\text{C}$  values in eggs and prey fish based upon C:N  
199 ratios in individual samples (C:N ratios for all samples were  $> 4.0$ ). For eggs, the equation used  
200 was from Elliott et al. [31],  $\delta^{13}\text{C}_{\text{lipid-corrected}} = \delta^{13}\text{C}_{\text{non-corrected}} - 4.46 + 7.32 * \text{Log}(\text{C:N ratio})$ . For  
201 fish,  $\delta^{13}\text{C}_{\text{lipid-corrected}} = \delta^{13}\text{C}_{\text{non-corrected}} - 3.32 + 0.99 * \text{C:N}$  [32].

202 Mercury isotope analysis was conducted at Trent University's Water Quality Centre.  
203 Details regarding mercury isotope analysis have been reported previously [33]. Mass-  
204 independent fractionation (MIF) of Hg isotopes is unrelated to isotope mass and is reported in  
205 capital delta ( $\Delta$ ) notation. MIF describes the difference between measured  $\delta^{\text{xxx}}\text{Hg}$  values and

206 scaled  $\delta^{202}\text{Hg}$  values ( $\Delta^{\text{xxx}}\text{Hg} = \delta^{\text{xxx}}\text{Hg} - (\delta^{202}\text{Hg} \times \beta)$ ).  $\beta$ , the scaling factor, is determined by  
207 theoretical laws of mass dependent fractionation (MDF) and is an isotope-specific constant.  
208 Here, the focus is on the interpretation of MDF ( $\delta^{202}\text{Hg}$ ) and MIF results ( $\Delta^{199}\text{Hg}$  and  $\Delta^{201}\text{Hg}$ ).  
209 MDF data can provide insights into pathways of mercury exposure, e.g. terrestrial versus aquatic  
210 [19], while MIF can be useful in assessing the processes influencing mercury isotope values in  
211 eggs. Hg isotope analyses were conducted on eggs from all four study species from both study  
212 sites allowing an assessment of whether MIF of Hg isotopes was influenced by bird trophic  
213 position (as inferred from egg  $\delta^{15}\text{N}$  values; see below). Samples were analyzed from a variety of  
214 years (2009-2017) for the different species.

215

## 216 Analytical and Statistical Methods

217 Annual estimates of synthetic oil/bitumen production from surface-mined oil sands  
218 deposits were obtained from CAPP [2].

219 Annual estimates of total forest fire extent (ha) for the province of Alberta were obtained  
220 from the National Forestry Database [13]. During the period of study, 99% of total annual area  
221 burned occurred during May-August with June-August usually being the focal months. Hence,  
222 these fires would have occurred after the egg-laying period in that same calendar year. Caldwell  
223 et al. [34] reported sediment MeHg levels peaked within three months after a wildfire, further  
224 delays would be expected in terms of wildfire-generated Hg being incorporated into food webs.  
225 Therefore, fire extent in the year preceding egg collection was used to assess the impact of fire  
226 on egg THg levels. The one-year time lag between forest fire extent and egg THg levels allowed  
227 time for Hg released from fires to be incorporated into, and passed through, the food webs  
228 utilized by birds.

229 Annual monthly estimates of Athabasca River flow were obtained from a hydrometric  
230 station located five km north of Fort McMurray (station 07DA001)  
231 ([https://wateroffice.ec.gc.ca/mainmenu/historical\\_data\\_index\\_e.html](https://wateroffice.ec.gc.ca/mainmenu/historical_data_index_e.html)). During the period of  
232 study, maximal monthly river flows were most often observed in June (seven of 10 years from  
233 2008-2016), therefore, June flow was used to estimate maximal annual river flow. Based upon  
234 Long and Pavelsky [16], years were categorized as being low (June mean monthly flow <1600  
235 m<sup>3</sup>/s) or high (June mean monthly flow ≥1600 m<sup>3</sup>/s) flow years. River flow in the year preceding  
236 egg collections was used to categorize egg collections as being influenced by low or high flow  
237 years. For example, mean river flow in June 2011 was >1600 m<sup>3</sup>/s, hence egg collections made  
238 in June 2012 were categorized as being influenced by a high flow year. The one-year time lag  
239 between river flow and egg THg levels allowed for the influence of river processes on Hg  
240 availability/dynamics to be incorporated into downstream food webs. This period of time is  
241 consistent with work examining the rapidity with which Hg is incorporated into foodwebs. For  
242 example, mercury levels in small fish responded within 1-2 years to changes in levels of Hg in  
243 the environment [35]. Such small fish species are an important component of the diet of gulls  
244 and terns and because eggs of these species are formed from locally-obtained exogenous  
245 resources, e.g. prey fish, we would expect egg Hg levels to respond within a similar time-frame  
246 to prey fish. For statistical comparisons, years were combined into either low or high flow  
247 categories and these categories were compared.

248 True color Landsat images [36] of the PAD and western Lake Athabasca were obtained  
249 from years of low (2002, 2010, 2015) and high (2011, 2014, 2017) Athabasca River flow. These  
250 images were used to qualitatively visualize annual differences in the extent of sediment plumes  
251 entering western Lake Athabasca.

252 Data regarding suspended sediment concentrations (SSC) and secchi depth (a measure of  
253 water clarity) were obtained from Long and Pavelski [37]. Data were available from sampling  
254 sites situated along a southeast-northwest transect crossing the western basin of the lake (see  
255 [16]). Distance of each sampling site from the mouth of the Athabasca River was estimated  
256 based upon georeferenced data. Data from low (2010) and high (2011) flow years were used to  
257 assess inter-year differences in the influence of the river on SSC in western Lake Athabasca and  
258 resultant impacts on water transparency.

259 Inter-year differences in variables were assessed using ANOVA or Kruskal-Wallis tests  
260 followed by selected post-hoc tests (Tukey's HSD or Dunn's test). Relationships between  
261 variables were evaluated using Pearson correlation coefficients ( $r$ ). Student's two-tailed t-tests  
262 were used to compare egg THg levels and Hg isotope values between years of low and high  
263 Athabasca River flow. All statistical analyses were conducted using Statistica Ver 12 [38] with  $\alpha$   
264 = 0.05. Assumptions underlying the use of parametric statistics were tested using Q-Q plots, the  
265 Shapiro-Wilk W test (normality), and Levene's test (homogeneity of variances).

266

## 267 **Results**

### 268 Temporal trends in egg THg concentrations (2009-2017)

269 Egg THg concentrations showed inter-year differences for most species/site combinations  
270 (Egg Island: Caspian Terns ANOVA  $F(7,72) = 8.83, p < 0.001$ ; Common Terns ANOVA  
271  $F(6,63) = 8.96, p < 0.001$ ; Mamawi Lake: Ring-billed Gulls Welch's ANOVA  $F(6,30) = 3.61, p$   
272  $= 0.01$ ; Common Terns Welch's ANOVA  $F(5,20) = 3.92, p = 0.01$ ) except for Egg Island  
273 California Gulls (Welch's ANOVA  $F(7,31) = 0.89, p = 0.53$ ). However, egg THg concentrations  
274 were not correlated with year of collection for Egg Island Caspian Terns ( $n = 80, r = -0.01, p =$

275 0.97), Egg Island Common Terns ( $n = 70$ ,  $r = 0.08$ ,  $p = 0.53$ ), or Mamawi Lake Ring-billed Gulls  
276 ( $n = 83$ ,  $r = -0.13$ ,  $p = 0.24$ ) (Figure 1A, B). THg levels in eggs of Egg Island California Gulls  
277 increased through time ( $n = 81$ ,  $r = 0.24$ ,  $p = 0.03$ ) while THg levels in Common Tern eggs from  
278 Mamawi Lake decreased ( $n = 55$ ,  $r = -0.40$ ,  $p = 0.002$ ) (Fig.1A, B). In both these cases, temporal  
279 trends were influenced by data from one year. For the Egg Island California Gull eggs, high THg  
280 levels in 2017 were responsible for the temporal increase. When 2017 data were removed from  
281 the analysis, there was no significant relationship with time ( $n = 71$ ,  $r = 0.08$ ,  $p = 0.52$ ).  
282 Similarly, the declining temporal trend in THg in Common Tern eggs from Mamawi Lake was  
283 driven by the 2009 data. When data from that year were omitted from the analysis, no temporal  
284 trends were evident ( $n = 45$ ,  $r = -0.06$ ,  $p = 0.71$ ).

285

286 **Fig 1.** Annual mean ( $\pm$  SE) THg levels ( $\mu\text{g/g}$ , dry weight) in gull and tern eggs from sites in  
287 receiving waters of the Athabasca River. (a) Egg Island, western Lake Athabasca: Caspian  
288 Terns, Common Terns, California Gulls (b) Mamawi Lake: Common Terns, Ring-billed Gulls.

289

## 290 Influence of oil sands production, forest fires, and bird diet on egg THg

291 Temporal trends in egg THg concentrations were not related to annual production of  
292 synthetic oil/bitumen from surface-mined oil sands deposits for any of the species/site  
293 combinations (2009-2016 annual data. Egg Island CAGU  $n = 8$ ,  $r = .56$ ,  $p = .15$ ; CATE  $n = 8$ ,  $r$   
294  $= -.03$ ,  $p = .94$ ; COTE  $n = 7$ ,  $r = .07$ ,  $p = .89$ ; Mamawi Lake RBGU  $n = 7$ ,  $r = -.13$ ,  $p = .78$ ;  
295 COTE  $n = 6$ ,  $r = -.67$ ,  $p = .14$ ). The production of synthetic oil/bitumen from surface mining  
296 showed a significant increase during the period of study ( $r = 0.996$ ,  $p < 0.001$ ) (Fig. S1) which  
297 was not reflected in the annual fluctuations observed in egg THg levels (Fig.1A, B).

298 Annual extent of forest fires preceding the year of egg collection showed no relationship  
299 with THg levels in Mamawi Lake eggs (Ring-billed Gulls,  $r = 0.23$ ,  $p = 0.59$ ; Common Terns  $r =$   
300  $-0.46$ ,  $p = 0.36$ ) nor in eggs of Caspian Terns ( $r = -0.18$ ,  $p = 0.64$ ) or Common Terns ( $r = -0.54$ ,  $p$   
301  $= 0.16$ ) at Egg Island. However, mean annual egg THg levels were correlated with forest fire  
302 extent in eggs of California Gulls ( $r = 0.73$ ,  $p = 0.03$ ) at that location (Fig. 2).

303  
304 **Fig 2.** Annual extent (ha) of forest fires in Alberta versus annual mean ( $\pm$  SE) THg levels (ug/g,  
305 dry weight) in California Gull eggs from Egg Island, Lake Athabasca. Annual egg THg levels  
306 were compared to forest fire extent in the year preceding egg collections.

307  
308 Egg stable nitrogen isotope values ( $\delta^{15}\text{N}$ ) were different among all species comparisons  
309 (Kruskal-Wallis  $H(3,369) = 171.85$ ,  $p < 0.001$ , Dunn's test, Caspian Tern  $>$  Common Tern  $>$   
310 California Gull  $>$  Ring-billed Gull).  $\delta^{15}\text{N}$  values within most species and sites showed no  
311 differences across years (Egg Island: California Gulls ANOVA  $F(7,73) = 2.12$ ,  $p = 0.051$ ;  
312 Caspian Terns ANOVA  $F(7,72) = 1.09$ ,  $p = 0.38$ ; Common Terns Kruskal-Wallis  $H(6,70) =$   
313  $9.37$ ,  $p = 0.15$ ; Mamawi Lake: Ring-billed Gulls Kruskal-Wallis  $H(6,83) = 12.86$ ,  $p = 0.05$ ,  
314 Dunn's post-hoc test no differences). Only Mamawi Lake Common Terns showed significant  
315 inter-year differences in egg  $\delta^{15}\text{N}$  values (Kruskal-Wallis  $H(5,55) = 20.76$ ,  $p = 0.01$ , Dunn's test)  
316 (Table S1). For three of the five species/site combinations, inter-year differences in  $\delta^{13}\text{C}$  values  
317 were observed but these were minimal with most years having similar values (Table S2).

318 Interspecific comparisons of stable Hg and carbon isotope values revealed significant  
319 differences among species (Fig.3). Egg  $\delta^{202}\text{Hg}$  values reflecting MDF of Hg isotopes were  
320 greater in California Gulls than the other bird species (ANOVA  $F(3,185) = 100.0$ ,  $p < 0.001$ ,

321 followed by Tukey's HSD test). Egg  $\delta^{13}\text{C}$  values were less negative in California Gulls (mean =  
322 -23.7‰) than the other three species (mean values; Common Tern = -26.3‰, Caspian Tern = -  
323 25.8‰, Ring-billed Gull = -25.7‰).  $\delta^{13}\text{C}$  values in Ring-billed Gulls were also less negative  
324 than Common Terns (Welch's ANOVA  $F(3,185) = 91.1, p < 0.001$ , followed by Tukey's HSD  
325 test).  $\delta^{13}\text{C}$  values in California Gulls showed the greatest deviation from those in prey fish (mean  
326  $\pm 1$  SD values, Emerald Shiner =  $-28.33 \pm 2.10$  (n=46), Spottail Shiner =  $-28.00 \pm 3.41$  (n=22)).

327  
328 **Fig 3.** Three-dimensional plot showing mass-dependent fractionation (MDF, as  $\delta^{202}\text{Hg}$ ) and  
329 mass independent fractionation (MIF, as  $\Delta 199$ ) of Hg in gull and tern eggs from Egg Island and  
330 Mamawi Lake. Also shown are lipid-corrected  $\delta^{13}\text{C}$  values in eggs. Samples shown here were  
331 collected in 2009, 2011, 2012, or 2014. Symbols: circles are Caspian Terns, squares are  
332 Common Terns, closed triangles are California Gulls, open triangles are Ring-billed Gulls.

333  
334 **Influence of riverine processes on egg THg, SSC, water clarity and Hg isotopes**

335 Annual maximal June flow for the Athabasca River indicated large inter-year differences  
336 with flow varying approximately three-fold during the period of study (Fig. S2). The Athabasca  
337 River is unregulated by dams and annual flow is related to the volume of snowpack and glacier  
338 melt [39-41]. Mean annual THg concentrations in eggs were linearly correlated with river flow  
339 from the previous year in two of the five species/site comparisons (Egg Island: Caspian Terns n  
340 = 8,  $r = 0.90, p = 0.003$ ; Common Terns n = 7,  $r = 0.89, p = 0.007$ ) (Fig.4).

341  
342 **Fig 4.** Annual mean June flow ( $\text{m}^3/\text{s}$ ) of the Athabasca River versus annual mean ( $\pm$  SE) THg  
343 levels ( $\mu\text{g}/\text{g}$  dry weight) in gull and tern eggs collected the following year. (a) Egg Island,

344 western Lake Athabasca: Caspian Terns, Common Terns, California Gulls (b) Mamawi Lake:  
345 Common Terns, Ring-billed Gulls. Annual egg THg levels were compared to river flow in the  
346 year preceding egg collections.

347  
348         However, visual examination of the data indicated that the relationship between egg THg  
349 concentrations and river flow might not be best described by a linear relationship. Instead, a  
350 threshold effect seemed more appropriate with greater egg THg levels being observed in years  
351 when river flow surpassed a mean June threshold of 1600 m<sup>3</sup>/s. To investigate this further, years  
352 were categorized as being low (<1600 m<sup>3</sup>/s) or high (≥1600 m<sup>3</sup>/s) flow based on June mean  
353 monthly flow. Years classified as low flow years were: 2008, 2010, 2012, 2015, 2016; high flow  
354 years were 2011, 2013, 2014. THg levels in eggs were elevated following high river flow years  
355 in the majority of species/sites examined (Fig.5). THg concentrations in eggs collected following  
356 high flow years were greater in Caspian Terns (Egg Island) (mean<sub>low</sub> = 1.51 µg·g<sup>-1</sup> dry wt,  
357 mean<sub>high</sub> = 2.49 µg·g<sup>-1</sup> dry wt;  $t = 6.85$ , 78 *d.f.*,  $p < 0.0001$ ), Common Terns (Egg Island)  
358 (mean<sub>low</sub> = 1.02 µg·g<sup>-1</sup> dry wt, mean<sub>high</sub> = 1.58 µg·g<sup>-1</sup> dry wt;  $t = 5.45$ , 68 *d.f.*,  $p < 0.0001$ ), and  
359 Ring-billed Gulls (Mamawi Lake) (mean<sub>low</sub> = 0.38 µg·g<sup>-1</sup> dry wt, mean<sub>high</sub> = 0.86 µg·g<sup>-1</sup> dry wt;  $t$   
360 = 5.60, 81 *d.f.*,  $p < 0.0001$ ). THg concentrations in eggs from these species/sites were on average  
361 82% greater in high flow versus low flow years. Eggs from Egg Island California Gulls ( $t = 0.24$ ,  
362 79 *d.f.*,  $p = 0.81$ ) and Mamawi Lake Common Terns ( $t = 0.19$ , 53 *d.f.*,  $p = 0.85$ ) did not show a  
363 significant difference in THg levels between low and high flow years. However, exclusion of the  
364 anomalously high 2009 egg THg data for Mamawi Lake Common Terns (highest mean δ<sup>15</sup>N  
365 value observed that year may have indicated possible influence of dietary differences) resulted in



366 detection of elevated THg levels in high flow years ( $\text{mean}_{\text{low}} = 0.98 \mu\text{g}\cdot\text{g}^{-1}$  dry wt,  $\text{mean}_{\text{high}} =$   
367  $1.20 \mu\text{g}\cdot\text{g}^{-1}$  dry wt;  $t = 2.74$ , 43 *d.f.*,  $p = 0.01$ ).

368

369 **Fig 5.** Annual mean ( $\pm$  SE) THg levels ( $\mu\text{g}/\text{g}$  dry weight) in eggs collected following years of  
370 low and high flow in the Athabasca River. Low flow years were categorized as those having a  
371 maximal annual flow of less than  $1600 \text{ m}^3/\text{s}$ . (a) Egg Island Caspian Terns (b) Egg Island  
372 Common Terns (c) Mamawi Lake Ring-billed Gulls (d) Mamawi Lake Common Terns (e) Egg  
373 Island California Gulls.

374

375 Athabasca River flow affected the extent of sediment plumes entering Lake Athabasca  
376 (Fig.6). Furthermore, lake SSC concentrations were greater in a high flow year (2011) versus a  
377 low flow year (2010) (Fig.S3). Differences in SSC were likely responsible for inter-year  
378 differences in secchi depth in western Lake Athabasca as water clarity was lower at sites with  
379 higher SSC, particularly at sites closer to the mouth of the Athabasca River (Fig.S3). Decreased  
380 water clarity was evident in the high flow year.

381

382 **Fig 6.** True color Landsat images of the PAD and western Lake Athabasca during years of low  
383 ( $<1600 \text{ m}^3/\text{s}$  June flow) and high ( $\geq 1600 \text{ m}^3/\text{s}$  June flow) Athabasca River flow. In high flow  
384 years, there is a notable increase in the extent of the brown sediment plume entering the lake.  
385 2015 image is obscured to some extent by white cloud cover but sediment is clearly visible. Red  
386 and white circles indicate the locations of Mamawi Lake and Egg Island, respectively. Brown  
387 oval indicates the Athabasca River mouth. Dates of image acquisition are shown.

388

389 For each species, differences in egg  $\Delta^{199}\text{Hg}$  values were observed following years of low  
390 and high Athabasca River flow (Table 1). Statistical comparison of mean  $\Delta^{199}\text{Hg}$  values in eggs  
391 collected following low flow years versus high flow years indicated higher  $\Delta^{199}\text{Hg}$  values  
392 following low flow years in California Gulls ( $t(67) = 3.50, p < 0.001$ ), Caspian Terns ( $t(38) =$   
393  $2.16, p = 0.04$ ), Common Terns ( $t(19) = 2.10, p = 0.049$ ), Ring-billed Gulls ( $t(55) = 3.18, p =$   
394  $0.002$ ). Similarly, egg  $\Delta^{201}\text{Hg}$  values were greater following low flow years than high flow years;  
395 California Gulls ( $t(67) = 2.62, p = 0.01$ ), Caspian Terns ( $t(38) = 2.16, p = 0.04$ ), Common Terns  
396 ( $t(19) = 2.68, p = 0.02$ ), Ring-billed Gulls ( $t(55) = 5.04, p < 0.001$ ) (data not shown).  $\Delta^{199}\text{Hg}$   
397 and  $\Delta^{201}\text{Hg}$  values in eggs of all species were correlated ( $\Delta^{199}\text{Hg} = 0.22 + 1.07 * \Delta^{201}\text{Hg}, n =$   
398  $187, r = 0.89, p < 0.001$ ). Based upon inter-specific differences between gulls and terns in egg  
399  $\delta^{13}\text{C}$  values (both California and Ring-billed Gulls differed from one or both tern species) and  
400  $\delta^{202}\text{Hg}$  (California Gulls differed) separate regression analyses were completed for terns and  
401 gulls. For gulls,  $\Delta^{199}\text{Hg} = 0.36 + 0.89 * \Delta^{201}\text{Hg}, n = 126, r = 0.81, p < 0.001$ , and for terns,  
402  $\Delta^{199}\text{Hg} = 0.09 + 1.25 * \Delta^{201}\text{Hg}, n = 61, r = 0.99, p < 0.001$ .  $\delta^{202}\text{Hg}$  values in eggs only differed  
403 between low and high flow categories for Common Terns ( $t(19) = 3.12, p < 0.01$ ), other species  
404 showed no differences between low and high flow (t-tests,  $p > 0.3$ ) (Table 1).

405  
406 **Table 1.** Annual mean (‰) mass dependent fractionation (MDF,  $\delta^{202}\text{Hg}$ ) and mass-independent  
407 fractionation (MIF,  $\Delta^{199}\text{Hg}$ ) of Hg isotopes in aquatic bird eggs. California Gulls (CAGU),  
408 Caspian Terns (CATE), Common Terns (COTE), and Ring-billed Gulls (RBGU) collected from  
409 Egg Island and Mamawi Lake. Athabasca River flow in the year preceding egg collections was  
410 categorized as low or high ( $\geq 1600 \text{ m}^3/\text{s}$  in June) for each year. MDF and MIF values were  
411 compared between flow categories for each species. \* indicates statistically significant

412 differences (t-test,  $p < 0.05$ ) between flow categories. n is the number of egg samples included in  
 413 each category.

|                    |      | Egg Island, Lake Athabasca |                         |                         |                         |                         |                         | Mamawi Lake,<br>Peace-Athabasca<br>Delta |                         |
|--------------------|------|----------------------------|-------------------------|-------------------------|-------------------------|-------------------------|-------------------------|------------------------------------------|-------------------------|
| Collection<br>Year | Flow | CAGU                       |                         | CATE                    |                         | COTE                    |                         | RBGU                                     |                         |
|                    |      | $\delta^{202}\text{Hg}$    | $\Delta^{199}\text{Hg}$ | $\delta^{202}\text{Hg}$ | $\Delta^{199}\text{Hg}$ | $\delta^{202}\text{Hg}$ | $\Delta^{199}\text{Hg}$ | $\delta^{202}\text{Hg}$                  | $\Delta^{199}\text{Hg}$ |
| 2009               | Low  | 0.78                       | 1.60                    | -0.49                   | 1.38                    |                         |                         | -0.43                                    | 0.92                    |
| 2011               | Low  | 0.60                       | 1.47                    | -0.21                   | 1.36                    | 0.10                    | 2.11                    |                                          |                         |
| 2012               | High | 0.58                       | 1.50                    | -0.32                   | 1.12                    |                         |                         | 0.01                                     | 0.90                    |
| 2014               | High | 0.91                       | 1.27                    | -0.51                   | 1.03                    | -0.48                   | 1.74                    | -0.24                                    | 0.74                    |
| 2015               | High | 0.89                       | 1.25                    |                         |                         |                         |                         | -0.15                                    | 0.91                    |
| 2016               | Low  | 1.16                       | 1.70                    |                         |                         |                         |                         | -0.13                                    | 1.16                    |
| 2017               | Low  | 1.11                       | 1.51                    |                         |                         |                         |                         | -0.05                                    | 0.95                    |
| Mean               | Low  | 0.90                       | 1.56*                   | -0.35                   | 1.37*                   | 0.10*                   | 2.11*                   | -0.20                                    | 1.01*                   |
|                    | n    | 42                         |                         | 20                      |                         | 11                      |                         | 30                                       |                         |
| Mean               | High | 0.79                       | 1.34                    | -0.42                   | 1.08                    | -0.48                   | 1.74                    | -0.13                                    | 0.85                    |
|                    | n    | 27                         |                         | 20                      |                         | 10                      |                         | 29                                       |                         |

414

415 Analysis of epiphytic lichen samples from the Fort McMurray region indicated relatively  
 416 little spatial variation in  $\Delta^{199}\text{Hg}$  (mean =  $-0.46 \pm 0.15\%$ , range -0.20 to -0.77‰) or  $\Delta^{201}\text{Hg}$   
 417 (mean =  $-0.54 \pm 0.17\%$ , range -0.18 to -0.86) values. Lichen  $\Delta^{199}\text{Hg}$  values were used to  
 418 estimate baseline MIF of Hg isotopes in atmospherically deposited Hg, an important source of  
 419 Hg entering the Athabasca River. Lichen  $\Delta^{199}\text{Hg}$  values measured here were similar to those in  
 420 abiotic environmental compartments in the oil sands region, i.e. surface soil (overburden) and  
 421 road material, bitumen and mined oil sand, processed oil sand, and Athabasca River oil sand  
 422 [27]. Using egg MIF data for terns from Egg Island and Mamawi Lake, the proportion of MeHg  
 423 photodegraded was estimated using a modified equation from Bergquist and Blum [21].

424 
$$\ln(f) = \{10^3 * \ln[10^{-3}(\Delta^{199}\text{Hg}_{\text{egg}} - \Delta^{199}\text{Hg}_{\text{lichen}}) + 1]\} / S$$

425 where  $f$  = fraction of MeHg photodegraded,  $\Delta^{199}\text{Hg}_{\text{egg}} = \Delta^{199}\text{Hg}$  in individual eggs,  $\Delta^{199}\text{Hg}_{\text{lichen}} =$   
426 average  $\Delta^{199}\text{Hg}$  in lichen samples (-0.46),  $S = -7.82$  (from the 10 mg/L dissolved organic carbon  
427 (DOC) photochemical demethylation experiment in Bergquist and Blum [21]; June 2015 DOC  
428 values in Lake Athabasca ranged from 4-7 mg/L). The amount of MeHg photodegraded was  
429 estimated to be  $21.6 \pm 5.5\%$  (mean  $\pm$  SD).

430

## 431 **Discussion**

432 In this study, annual differences in oil sands production, bird diets, and extent of forest  
433 fires had little impact on THg levels in eggs of aquatic birds. Conversely, THg concentrations in  
434 eggs were consistently influenced by processes associated with the Athabasca River. For the  
435 majority of species/site analyses, higher egg THg concentrations were observed in eggs laid  
436 following years of high river flow. The threshold effect of river flow on egg THg levels was  
437 consistent with Long and Pavelsky's [16] results demonstrating the influence of river flow on  
438 SSC in Lake Athabasca. Enhanced movement of sediment-associated Hg into downstream  
439 ecosystems following high river flow may be a critical factor regulating Hg availability in  
440 downstream biota. Studies in freshwater rivers have demonstrated the importance of seasonal  
441 events on the fate of Hg. In some cases, the annual export of Hg from a watershed can be  
442 determined by a single high flow event [42]. Hence, flow was likely of critical importance in  
443 moving contaminated sediments to downstream areas with resultant impacts on the  
444 bioavailability of Hg to wildlife such as birds.

445 Two processes may have contributed to higher egg THg levels following years of high  
446 river flow. The first stems from the possibility that in high flow years, light attenuation  
447 associated with high water SSC may have reduced the amount of photochemical degradation of

448 MeHg. This could have resulted in an increase in the amount of MeHg available for uptake into  
449 foodwebs elevating MeHg exposure of laying females with resultant increases in egg THg  
450 concentrations. This mechanism cannot likely account for the inter-year differences in egg THg  
451 concentrations associated with river flow because only 22% of the MeHg in the tern species was  
452 estimated to have been photodegraded. The Athabasca River downstream of Fort McMurray is  
453 characterized by high SSC which reduces water transparency and possibly limits the scope for  
454 photochemical degradation of MeHg to occur. Despite the fact that photochemical degradation of  
455 MeHg was not likely responsible for inter-year fluctuations in egg THg concentrations, inter-  
456 year variability in MIF of Hg isotopes was useful in linking river sources of Hg to Hg  
457 accumulated in bird eggs. Inter-year differences in egg  $\Delta^{199}\text{Hg}$  and  $\Delta^{201}\text{Hg}$  values between years  
458 of low and high flow provided evidence that riverine processes not only regulated the amount of  
459 Hg to which birds were exposed but also the isotopic composition of that Hg.

460         The slope (1.25) of the  $\Delta^{201}\text{Hg}/\Delta^{199}\text{Hg}$  regression for terns was similar to the value  
461 associated with photoreduction of MeHg (1.3) indicating that MeHg photoreduction was likely  
462 responsible for  $\Delta^{199}\text{Hg}$  and  $\Delta^{201}\text{Hg}$  values observed in eggs of those species. However, for gulls,  
463 a lower slope (0.89) was observed which was more similar to that associated with the  
464 photochemical reduction of  $\text{Hg}^{2+}$  (slope = 1.0, [21]). Tsui et al. [19] reported similar Hg isotope  
465 patterns in biota associated with aquatic (slope = 1.20 in benthic invertebrates, slope = 1.24 in  
466 trout) versus terrestrial food webs (slope = 1.05). They hypothesized that the mechanisms  
467 underlying MIF of Hg differed between aquatic and terrestrial ecosystems. In terrestrial systems,  
468  $\text{Hg}^{2+}$  may be extensively photoreduced before the non-photoreduced  $\text{Hg}^{2+}$  undergoes  
469 methylation. Hence, differences in Hg sources, pathways of exposure, and environmental Hg  
470 processing, could explain the differences in egg Hg trends detected in California Gulls (i.e.

471 detection of a fire signal) versus the other species. Increased use of terrestrial resources by gulls  
472 was supported by both the egg Hg MDF ( $\delta^{202}\text{Hg}$ ) and  $\delta^{13}\text{C}$  data. Tsui et al. [19] reported higher  
473  $\delta^{202}\text{Hg}$  values in organisms associated with terrestrial systems; similar to what was observed for  
474 California Gulls in this study. Carbon isotope results corroborated this interpretation as egg  $\delta^{13}\text{C}$   
475 values in terns were more negative than those measured in gulls. This was consistent with what  
476 would be expected based upon differences in  $\delta^{13}\text{C}$  values of food originating from freshwater  
477 and terrestrial ecosystems [43] and suggested that gulls were incorporating terrestrial foods into  
478 their diets in addition to aquatic prey. These results reflected the well-characterized, more  
479 omnivorous diet of gulls (see [44] for an example). However, all of the bird species, including  
480 gulls, exhibited MIF of Hg that reflected the importance of aquatic processes in regulating egg  
481 Hg isotope values. Consistent differences in  $\Delta^{199}\text{Hg}$  values between low and high flow year  
482 categories for all bird species indicated that all of them were linked to aquatic ecosystem  
483 processes. It is just possible that gulls may also show connections with terrestrial processes as  
484 well.

485         Here, we do not provide direct evidence linking Hg levels in eggs to oil sands sources.  
486 However, previous studies have demonstrated that oil sands developments are a source of Hg to  
487 the local environment [3, 4]. For example, Hg in snow was 5.6 times greater within 50 km of oil  
488 sands processing facilities than outside that area [3]. Hg levels in water sampled in summer were  
489 three times greater downstream of areas disturbed by oil sands development than at upstream  
490 locations situated in the mineable oil sands region [3]. Water Hg concentrations further  
491 downstream in the Athabasca River and PAD were two times greater than these upstream  
492 concentrations [3]. Elevated levels of Hg in abiotic environmental matrices are also reflected in  
493 biota. For example, THg concentrations in prey fish sampled from the Athabasca River in the

494 surface mineable oil sands region were five times greater than fish collected from the Athabasca  
495 River upstream of the oil sands [15]. THg levels in prey fish collected in the PAD and Lake  
496 Athabasca were two to four times greater than fish from the upstream Athabasca River site [15].  
497 THg levels in eggs of California Gulls and Herring Gulls (*Larus argentatus*) were two and three  
498 times greater, respectively, at Egg Island (Lake Athabasca) than at Namur Lake, an inland lake  
499 isolated from the Athabasca River but in close proximity (~60 km west) to open-pit oil sands  
500 mines [15]. Taken together, these results indicate that the oil sands are a source of Hg to the  
501 environment and that biota inhabiting waters in or downstream of the oil sands have higher Hg  
502 levels. To understand this further, an integrated research program involving Hg measurements in  
503 air, water, land, and biota is required to assess the relative importance of oil sands sources as a  
504 contributor to the overall Hg budget of the Athabasca River and downstream ecosystems. With  
505 respect to bird eggs, we can begin to predict expected Hg levels based upon river flow. For  
506 example, in 2017, mean June river flow was high (~1590 m<sup>3</sup>/s), hence egg THg levels in 2018  
507 are also predicted to be high. Eggs are currently being analyzed to test this hypothesis.

508       Until now, uncertainty surrounded the degree to which Hg may be transported by the  
509 Athabasca River to ecosystems far downstream. Following spring melt of the snowpack in the  
510 Athabasca River watershed, it is likely that some of the snow-associated mercury finds its way  
511 into the river. This is particularly true in the spring when frozen soils may limit infiltration of  
512 runoff into soil leading to efficient Hg export to the Athabasca River from overland sources [45,  
513 46]. Furthermore, during high flow years, Athabasca River sediments are mobilized and  
514 transported to downstream environments such as the PAD and western Lake Athabasca [16].  
515 River systems can convey 90% of their total heavy metal load via sediment transport [17, 42,  
516 46]. Hence, it is highly likely that Athabasca River sediments are transporting Hg to areas far

517 downstream. This hypothesis was supported by Long and Pavelsky's [37] data and by satellite  
518 images showing inter-year differences in sediment plumes into Lake Athabasca. Aquatic bird  
519 egg THg concentrations and Hg isotope data indicate that this Hg is being incorporated into  
520 downstream food webs.

521         The importance of the current study lies in its highlighting the degree to which local  
522 inputs of Hg to the river via atmospheric releases, mobilization associated with land disturbance,  
523 or dust/leakage from tailings ponds (but see [47]) will not remain confined to the local receiving  
524 environment. Hg from these sources will be transported long distances via the river to sensitive  
525 downstream ecosystems, e.g. PAD, WBNP, that are recognized for their unique, world-class  
526 ecological characteristics. New surface-mine oil sands projects are being proposed that will bring  
527 development much closer (~30 km) to the southern boundary of the PAD/WBNP. This will  
528 likely increase Hg inputs into the local environment through Hg mobilization stemming from  
529 further land development and atmospheric Hg releases. The zone of atmospheric deposition may  
530 encompass southern parts of the PAD/WBNP based upon the size of depositional zones  
531 previously characterized for oil sands operations [3, 4]. Hence, further oil sands development  
532 may result in increased delivery of Hg to downstream/downwind areas. The impacts of multiple  
533 stressors (including oil sands) on WBNP have resulted in it being investigated as an UNESCO  
534 World Heritage Site in Danger. Cumulative impact assessment of existing and proposed oil sands  
535 mining projects needs to consider potential Hg impacts on wildlife and humans inhabiting this  
536 globally-recognized area of ecological importance.

537

538 **SUPPORTING INFORMATION**



539 **Figure S1** shows temporal trends in surface-mineable oil sands production. **Figure S2** shows  
540 annual trends in Athabasca River June flow. **Figure S3** contrasts suspended sediment  
541 concentrations and water transparency in Lake Athabasca in years of low versus high river flow.  
542 **Table S1** and **Table S2** tabulate stable carbon and nitrogen isotope data by species, site and year,  
543 respectively.

544

## 545 **Acknowledgments**

546 The Mikisew Cree First Nation (MCFN), the Athabasca Chipewyan First Nation, and Métis  
547 Local 125 are thanked for their support and for granting permission for collections on their  
548 traditional lands. J. Marten, L. McKay (MCFN); A. Caron, S. Dolgova, L. Shutt, D.V.C.  
549 Weseloh, M. Zanuttig (ECCC); D. Campbell, Q. Gray, R. Kindopp, J. Lankshear, L. Patterson, J.  
550 Straka (Parks Canada Agency); B. Maclean, G. Paterson and E. Seed assisted with egg  
551 collections. Fort Chipewyan Community-based Monitoring Program staff provided prey fish. J.  
552 Chapman (Carleton University) sorted prey fish according to species. J. Chételat, L. Mundy, C.  
553 Boutin, D. Carpenter, H. Gill, and P. Thomas (ECCC) supplied lichen samples for Hg isotope  
554 analysis. Tissue Processing Laboratory staff, National Wildlife Research Centre, are thanked for  
555 their expert preparation of samples. S. Dolgova, E. Porter (ECCC) conducted the egg mercury  
556 analyses. W. Abdi, G.G. Hatch Stable Isotope Laboratory, University of Ottawa, is thanked for  
557 stable nitrogen and carbon isotope analysis. Stable mercury isotope analysis was conducted by B.  
558 Georg, Water Quality Centre, Trent University; P. Dillon facilitated these analyses. V. Wynja  
559 (ECCC) sourced the Landsat images and the United States Geological Survey is thanked for  
560 making the images available. This research was funded by the Joint Canada-Alberta Oil Sands  
561 Monitoring Program.

562

## 563 **References**

564 1. Hebert CE, Campbell D, Kindopp R, MacMillan S, Martin P, Neugebauer E, Patterson L,  
565 Shatford J (2013). Mercury trends in colonial waterbird eggs downstream of the oil sands region  
566 of Alberta, Canada. *Environ Sci Technol* 47: 11785-11792.

567

568 2. CAPP (Canadian Association of Petroleum Producers) (2018) Statistical Handbook.  
569 <https://www.capp.ca/publications-and-statistics/statistics>. Accessed Oct 3, 2018.

570

571 3. Kelly EN, Schindler DW, Hodson PV, Short JW, Radmanovich R, Nielsen CC (2010) Oil  
572 sands development contributes elements toxic at low concentrations to the Athabasca River and  
573 its tributaries. *Proc Natl Acad Sci USA* 107: 16178–16183.

574

575 4. Kirk JL, Muir DCG, Gleason A, Wang XW, Lawson G, Frank RA, Lehnerr I, Wrona F  
576 (2014) Atmospheric deposition of mercury and methylmercury to landscapes and waterbodies of  
577 the Athabasca Oil Sands region. *Environ Sci Technol* 48: 7374-7383.

578

579 5. Ramsar (2016) The Ramsar Convention Manual: a Guide to the Convention on Wetlands, 4th  
580 ed. Ramsar Convention Secretariat, Gland, Switzerland.

581

582 6. Kuyt E (1993) Whooping crane, *Grus americana*, home range and breeding range expansion  
583 in Wood Buffalo National Park, 1970–1991. *Can Field Nat* 107: 1–12.

584

- 585 7. Hebert CE, Nordstrom W, Shutt JL (2010) Colonial waterbirds nesting on Egg Island, Lake  
586 Athabasca. *Can Field Nat* 124: 49–53.  
587
- 588 8. Chan L, Receveur O, Batal M, David W, Schwartz H, Ing A, Fediuk K, Tikhonov C (2016)  
589 First Nations Food, Nutrition and Environment Study (FNFNES): Results from Alberta 2013.  
590 University of Ottawa, Ottawa, ON, pp. 155.  
591
- 592 9. Hebert CE, Norstrom RJ, Weseloh DV (1999a) A quarter century of environmental  
593 surveillance: the Canadian Wildlife Service’s Great Lakes Herring Gull Monitoring Program.  
594 *Environ Rev* 7: 147-166.  
595
- 596 10. Hobson KA, Hughes KD, Ewins PJ (1997) Using stable isotope analysis to identify  
597 endogenous and exogenous sources of nutrients in eggs of migratory birds: Applications to Great  
598 Lakes contaminants research. *Auk* 114: 467–478.  
599
- 600 11. Biswas A, Blum JD, Klaue B, Keeler GJ (2007) Release of mercury from Rocky Mountain  
601 forest fires. *Global Biogeochem Cycles*. doi: 10.1029/2006GB002696  
602
- 603 12. Wiedinmyer C, Friedli H (2007) Mercury emission estimates from fires: an initial inventory  
604 for the United States. *Environ Sci Technol* 41: 8092–8098.  
605

- 606 13. National Forestry Database (2018). Annual forest area burned for Alberta. National  
607 Resources Canada, Ottawa, ON, Canada. <http://nfdp.ccfm.org/en/data/fires.php>. Accessed Oct 3,  
608 2018.  
609
- 610 14. Hebert CE, Weseloh DVC, MacMillan S, Campbell D, Nordstrom W (2011) Metals and  
611 PAHs in colonial waterbird eggs from Lake Athabasca and the Peace-Athabasca Delta, Canada.  
612 *Environ Toxicol Chem* 30: 1178-1183.  
613
- 614 15. Dolgova S, Popp BN, Courtoreille K, Espie RHM, Maclean B, McMaster M, Straka JR,  
615 Tetreault GR, Wilkie S, Hebert CE (2018) Spatial trends in a biomagnifying contaminant:  
616 application of amino acid compound specific stable nitrogen isotope analysis to the interpretation  
617 of bird mercury levels. *Environ Toxicol Chem* 37: 1466–1475.  
618
- 619 16. Long CM, Pavelsky TM (2013) Remote sensing of suspended sediment concentration and  
620 hydrologic connectivity in a complex wetland environment. *Remote Sens Environ* 129: 197–209.  
621
- 622 17. Carroll RWH, Warwick JJ, Heim KJ, Bonzongo JC, Miller JR, Lyons WB (2000) Simulation  
623 of mercury transport and fate in the Carson River, Nevada. *Ecol Model* 125: 255-278.  
624
- 625 18. Blum JD, Sherman SL, Johnson ML (2014) Mercury isotopes in earth and environmental  
626 sciences. *Annu Rev Earth Planet Sci* 42: 249–69.  
627
- 628 19. Tsui MTK, Blum JD, Finlay JC, Balogh SJ, Nollet YH, Palen WJ, Power ME (2014)

- 629 Variation in terrestrial and aquatic sources of methylmercury in stream predators as revealed by  
630 stable mercury isotopes. *Environ Sci Technol* 48: 10128-10135.  
631
- 632 20. Kwon SY, Blum JD, Carvan MJ, Basu N, Head JA, Madenjian CP, David SR (2012)  
633 Absence of fractionation of mercury isotopes during trophic transfer of methylmercury to  
634 freshwater fish in captivity. *Environ Sci Technol* 46: 7527-7534.  
635
- 636 21. Bergquist BA, Blum JD (2007) Mass-dependent and  $\delta$ -independent fractionation of Hg  
637 isotopes by photoreduction in aquatic systems. *Science* 318: 417–420.  
638
- 639 22. Tsui MTK, Blum JD, Finlay JC, Balogh SJ, Kwon SY, Nollet YH (2013) Photodegradation  
640 of methylmercury in stream ecosystems. *Limnol Oceanogr* 58: 13–22.  
641
- 642 23. Point D, Sonke JE, Day RD, Roseneau DG, Hobson KA, Vander Pol SS, Moors AJ, Pugh  
643 RS, Donard OFX, Becker PR (2011) Methylmercury photodegradation influenced by sea-ice  
644 cover in Arctic marine ecosystems. *Nature Geoscience* 4: 188-194.  
645
- 646 24. Day RD, Roseneau DG, Berail S, Hobson KA, Donard OFX, Vander Pol SS, Pugh RS,  
647 Moors AJ, Long SE, Becker PR (2012) Mercury stable isotopes in seabird eggs reflect a gradient  
648 from terrestrial geogenic to oceanic mercury reservoirs. *Environ Sci Technol* 46: 5327–5335.  
649
- 650 25. Sherman LS, Blum JD (2013) Mercury stable isotopes in sediments and largemouth bass  
651 from Florida lakes, USA. *Sci Total Environ* 448: 163–175.

652

653 26. Bargagli R, Barghigiani C (1991) Lichen biomonitoring of mercury emission and deposition  
654 in mining, geothermal and volcanic areas of Italy. *Environ Monit Assess* 16: 265–275.

655

656 27. Blum J, Johnson M, Gleason J, Demers J, Landis M, Krupa S (2012) Mercury concentration  
657 and isotopic composition of epiphytic tree lichens in the Alberta oil sands region. In: Percy KE,  
658 ed. *Alberta Oil Sands: Energy, Industry, and The Environment*. Elsevier Ltd, Oxford, UK. pp  
659 373-390.

660

661 28. Hebert CE, Popp BN (2018) Temporal trends in a biomagnifying contaminant:  
662 Application of amino acid compound specific stable nitrogen isotope analysis to the  
663 interpretation of bird mercury levels. *Environ Toxicol Chem* 37: 1458-1465.

664

665 29. Ackerman JT, Herzog MP, Schwarzbach SE (2013) Methylmercury is the dominant form of  
666 mercury in bird eggs: A synthesis. *Environ Sci Technol* 47: 2052–2060.

667

668 30. Kelly JF (2000) Stable isotopes of carbon and nitrogen in the study of avian and mammalian  
669 trophic ecology. *Can J Zool* 78: 1–27.

670

671 31. Elliott KH, Davis M, Elliott JE (2014) Equations for lipid normalization of carbon stable  
672 isotope ratios in aquatic bird eggs. *PLOS ONE* 9: e83597.

673

- 674 32. Post DM, Layman CA, Arrington DA, Takimoto G, Quattrochi J, Montaña CG (2007)  
675 Getting to the fat of the matter: models, methods and assumptions for dealing with lipids in  
676 stable isotope analyses. *Oecologia* 152: 179–189.  
677
- 678 33. Georg RB, Newman K (2015) The effect of hydride formation on instrumental mass  
679 discrimination in MC-ICP-MS: a case study of mercury (Hg) and thallium (Tl) isotopes. *J Anal*  
680 *At Spectrom* 30: 1935-1944.  
681
- 682 34. Caldwell CA, Canavaan CM, Bloom NS (2000) Potential effects of a forest fire and storm  
683 flow on total mercury and methylmercury in sediments of an arid-lands reservoir. *Sci Total*  
684 *Environ* 260: 125–133.  
685
- 686 35. Harris RC, Rudd JWM, Amyot M, Babiarz CL, Beaty KG, et al. (2007) Whole-ecosystem  
687 study shows rapid fish-mercury response to changes in mercury deposition. *Proc Natl Acad Sci*  
688 *USA* 104: 16586–16591.  
689
- 690 36. USGS (United States Geological Survey) (2018) Landsat Missions. <https://landsat.usgs.gov/>.  
691 Accessed Oct 3, 2018.  
692
- 693 37. Long CM, Pavelsky TM (2012) Water Quality and Spectral Reflectance, Peace-Athabasca  
694 Delta, Canada, 2010 - 2011. Data set. 2012. Available online [<http://daac.ornl.gov>] from Oak  
695 Ridge National Laboratory Distributed Active Archive Center, Oak Ridge, Tennessee, U.S.A.  
696 <http://dx.doi.org/10.3334/ORNLDAAC/1133>. Accessed Oct 3, 2018.

- 697
- 698 38. StatSoft (2013). Statistica (Data Analysis Software System), Ver 12. Tulsa, OK, USA.
- 699
- 700 39. Schindler DW (2001) The cumulative effects of climate warming and other human  
701 stresses on Canadian freshwaters in the new millennium. *Can J Fish Aquat Sci* 58: 18–29.
- 702
- 703 40. Schindler DW, Donahue WF (2006). An impending water crisis in Canada's western  
704 prairie provinces. *Proc Natl Acad Sci USA* 103: 7210–7216.
- 705
- 706 41. DibikeaY, Eumb H, Prowse T (2018) Modelling the Athabasca watershed snow response to a  
707 changing climate. *J Hydrol: Regional Studies* 15: 134–148.
- 708
- 709 42. Babiarz CL, Hurley JP, Benoit JM, Shafer MM, Andren AW, Webb DA (1998) Seasonal  
710 influences on partitioning and transport of total and methyl–mercury in rivers from contrasting  
711 watersheds. *Biogeochem* 41: 237–257.
- 712
- 713 43. Hebert CE, Shutt JL, Hobson KA, Weseloh DV (1999b) Spatial and temporal differences in  
714 the diet of Great Lakes herring gulls (*Larus argentatus*): Evidence from stable isotope analysis.  
715 *Can J Fish Aquatic Sci* 56: 323–338.
- 716
- 717 44. Nisbet IC, Weseloh DV, Hebert CE, Mallory ML, Poole AF, Ellis JC, Pyle P, Patten MA  
718 (2017) Herring Gull (*Larus argentatus*). In: Rodewald PG, ed. *The Birds of North America*.



719 Cornell Lab of Ornithology, Ithaca, NY Retrieved from the Birds of North America:

720 <https://birdsna.org/Species-Account/bna/species/hergul>. Accessed Oct 3, 2018.

721

722 45. Hurley JP, Shafer MM, Cowell SE, Overdier JT, Hughes PE, Armstrong DE (1996) Trace  
723 metal assessment of Lake Michigan tributaries using low-level techniques. Environ Sci Technol  
724 30: 2093–2098.

725

726 46. Balogh SJ, Meyer ML, Johnson DK (1997) Mercury and suspended sediment loadings in the  
727 lower Minnesota River. Environ Sci Technol 31: 198–202.

728

729 47. Willis CE, St Louis VL, Kirk JL, St Pierre KA, Dodge C (2018) Tailings ponds of the  
730 Athabasca Oil Sands Region, Alberta, Canada, are likely not significant sources of total mercury  
731 and methylmercury to nearby ground and surface waters. Sci Total Environ 647: 1604–1610.

732

733

734

735

736

737

738

739

740

741

## 742 **Supplementary Information**

### 743 Captions

744 S1\_Table. Annual mean ( $\pm 1$  SD)  $\delta^{15}\text{N}$  values (‰) in eggs of California Gulls (CAGU), Caspian  
745 Terns (CATE), Common Terns (COTE), and Ring-billed Gulls (RBGU) collected from Egg  
746 Island and Mamawi Lake. At each site, inter-year differences in species-specific  $\delta^{15}\text{N}$  values  
747 were evaluated using ANOVA or Kruskal-Wallis/Dunn's tests. Superscript letters indicate  
748 statistically significant differences ( $p < 0.05$ ) between years. Means with the same letter are not  
749 different.  $n$  is the number of samples analyzed for each species at each site.

750

751 S2\_Table. Annual mean ( $\pm 1$  SD)  $\delta^{13}\text{C}$  values (‰) in eggs of California Gulls (CAGU), Caspian  
752 Terns (CATE), Common Terns (COTE), and Ring-billed Gulls (RBGU) collected from Egg  
753 Island and Mamawi Lake.  $\delta^{13}\text{C}$  values were adjusted for lipid content. At each site, inter-year  
754 differences in species-specific  $\delta^{13}\text{C}$  values were evaluated using ANOVA/Tukey's HSD or  
755 Kruskal-Wallis/Dunn's tests. Superscript letters indicate statistically significant differences ( $p <$   
756  $0.05$ ) between years. Means with the same letter are not different.  $n$  is the number of samples  
757 analyzed for each species at each site.

758

759 S1\_Fig. Surface-mineable oil sands production (synthetic oil and bitumen) in millions of barrels  
760 per day, 1967-2016. Data are from CAPP [2]. The dashed line indicates the beginning of the  
761 period during which egg samples were collected to assess temporal trends in mercury levels.

762

763 S2\_Fig. Mean June flow ( $\text{m}^3/\text{s}$ ) of the Athabasca River north of Fort McMurray (station  
764 07DA001) from 1958-2016. The dashed line indicates the beginning of the period during which

765 the influence of river flow on egg THg levels was investigated. Data are from Canadian  
766 Hydrographic Service ([https://wateroffice.ec.gc.ca/mainmenu/historical\\_data\\_index\\_e.html](https://wateroffice.ec.gc.ca/mainmenu/historical_data_index_e.html)).  
767  
768 S3\_Fig. Suspended sediment concentrations (SSC) (mg/L) and secchi disc depth (cm) along a  
769 transect from a point (58.6724 N, -110.8477 W) at the mouth of the Athabasca River. Data for a  
770 low flow (2010) and a high flow year (2011) are shown. Data are from Long and Pavelsky [37].

(A)

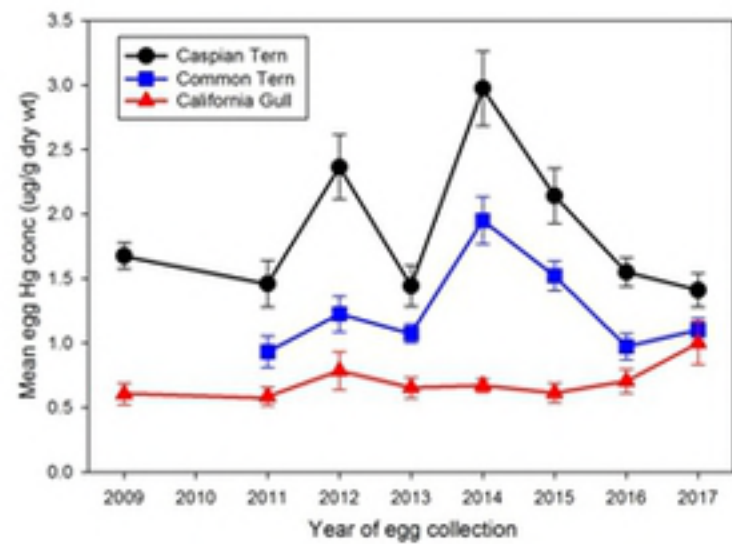

(B)

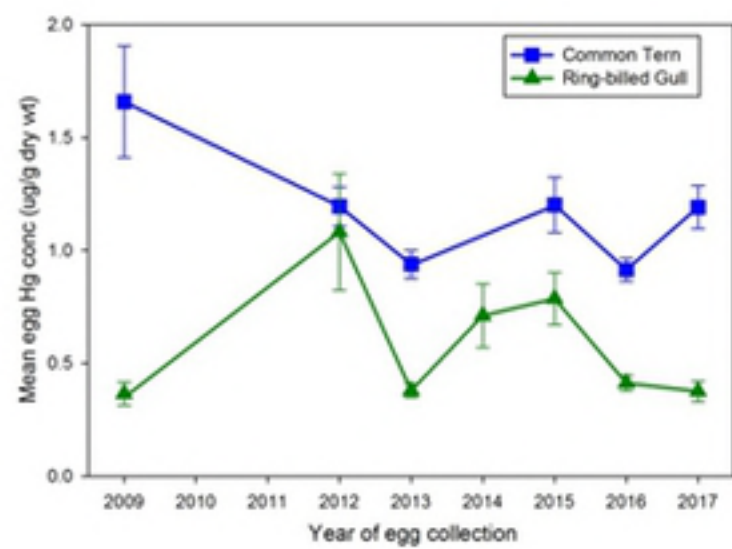

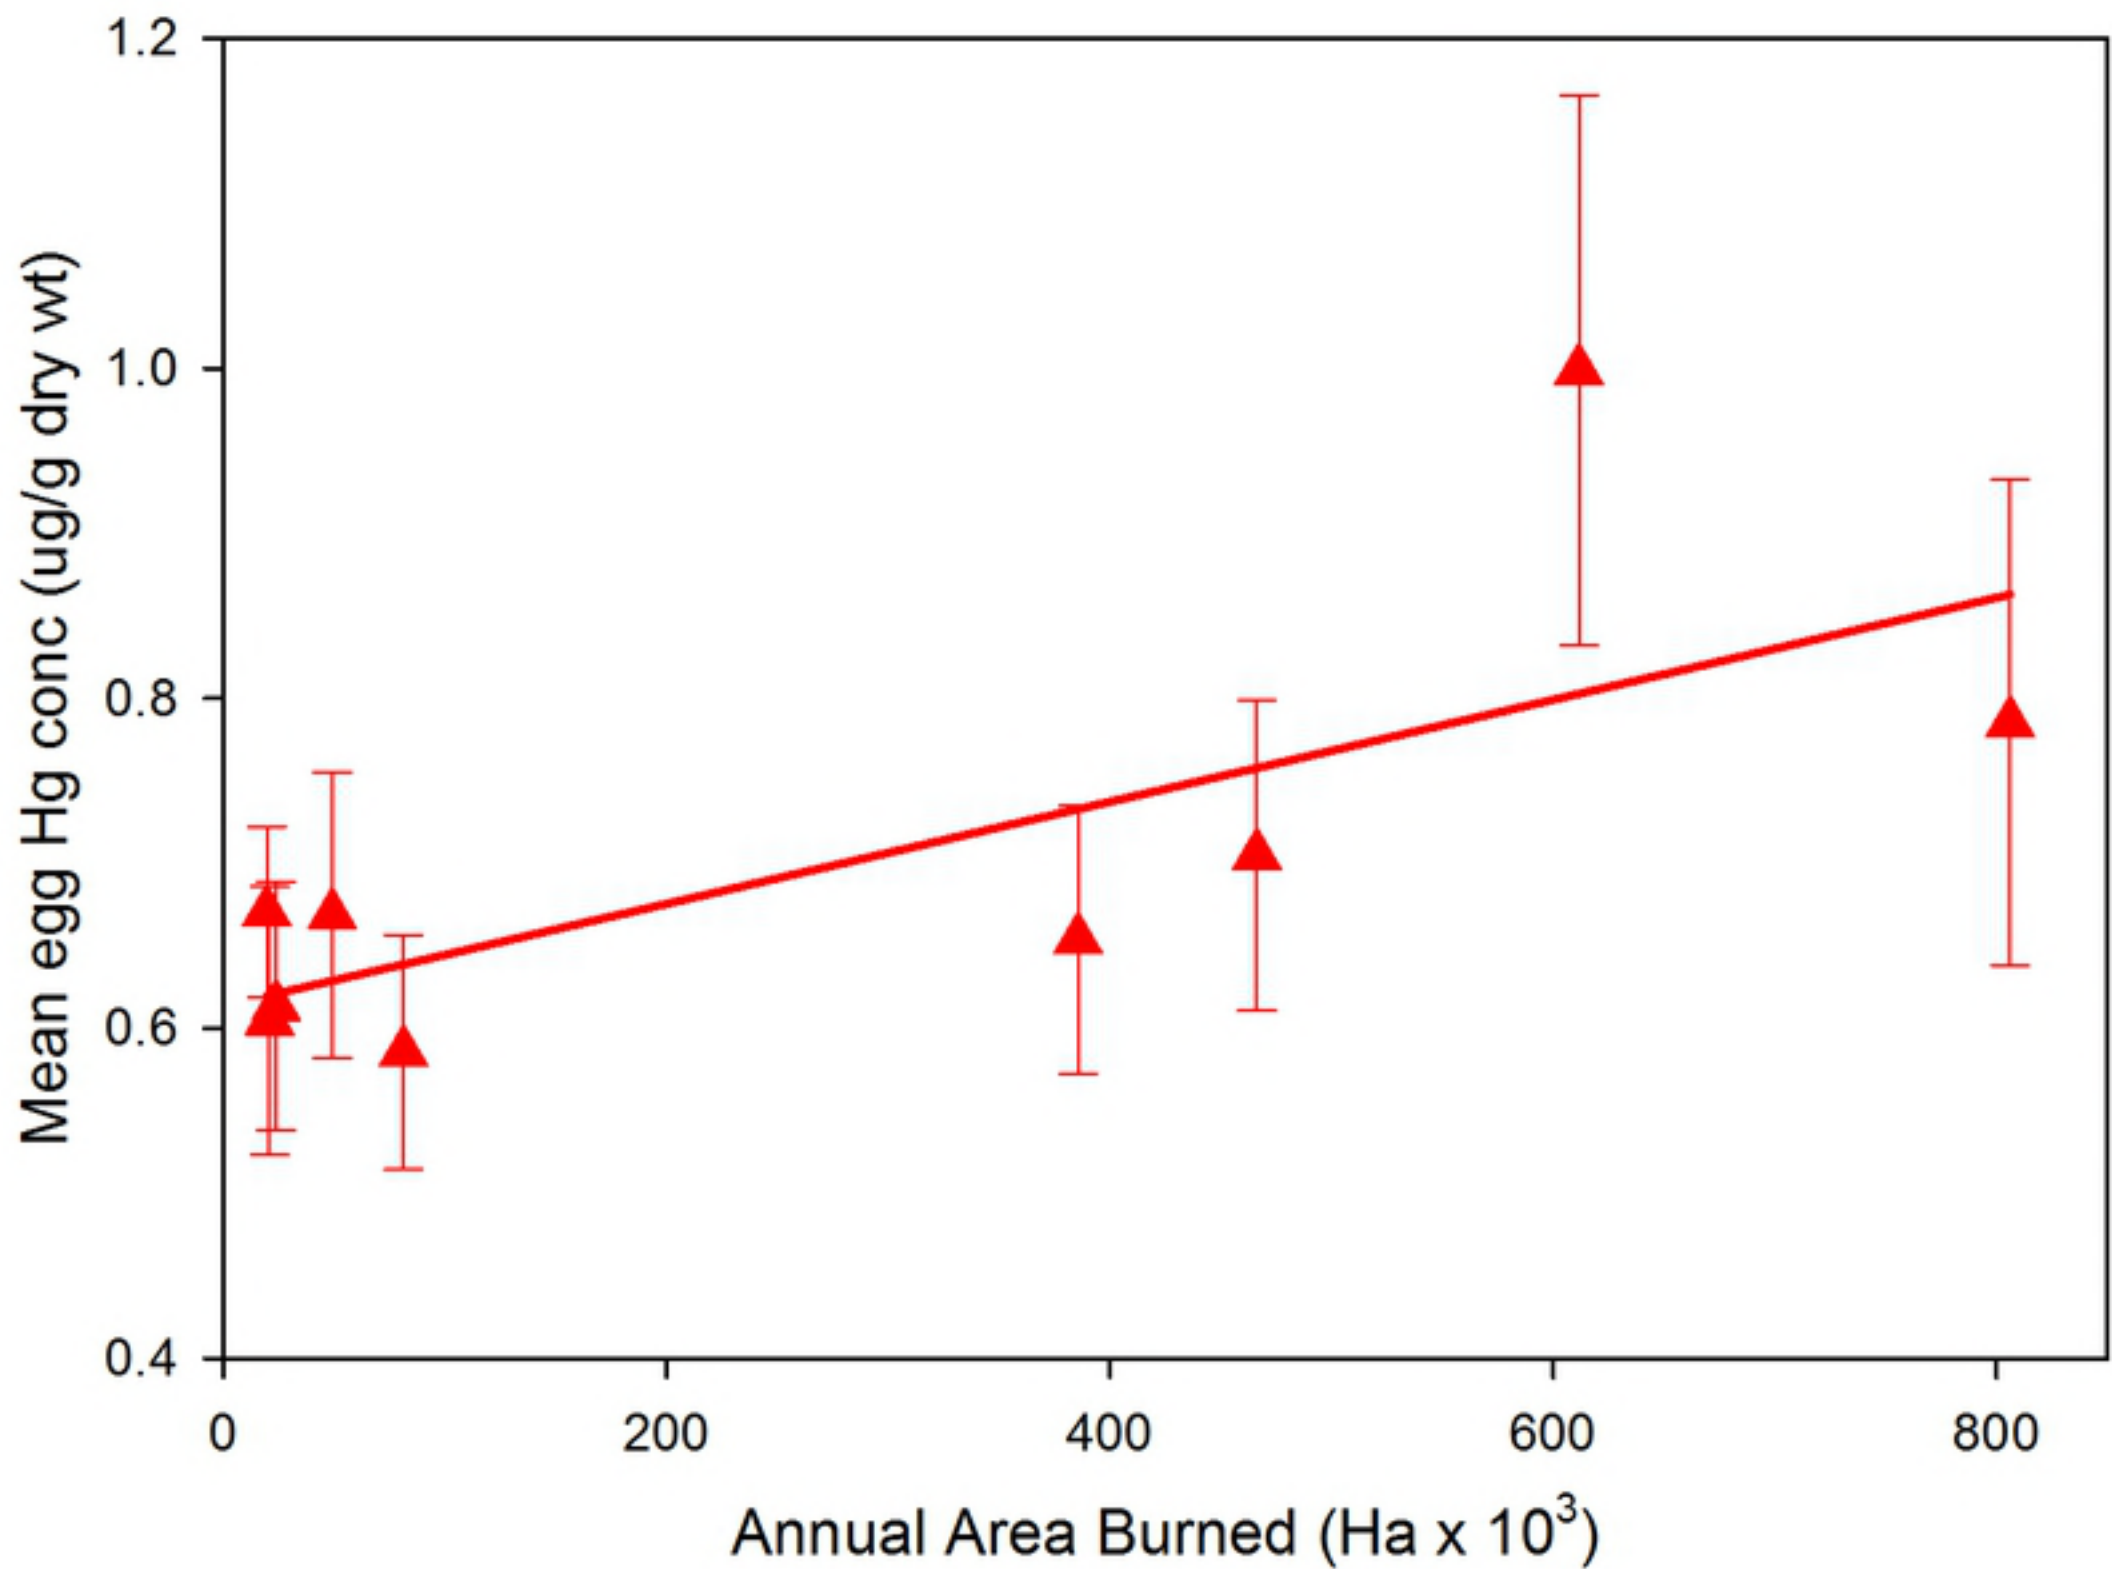

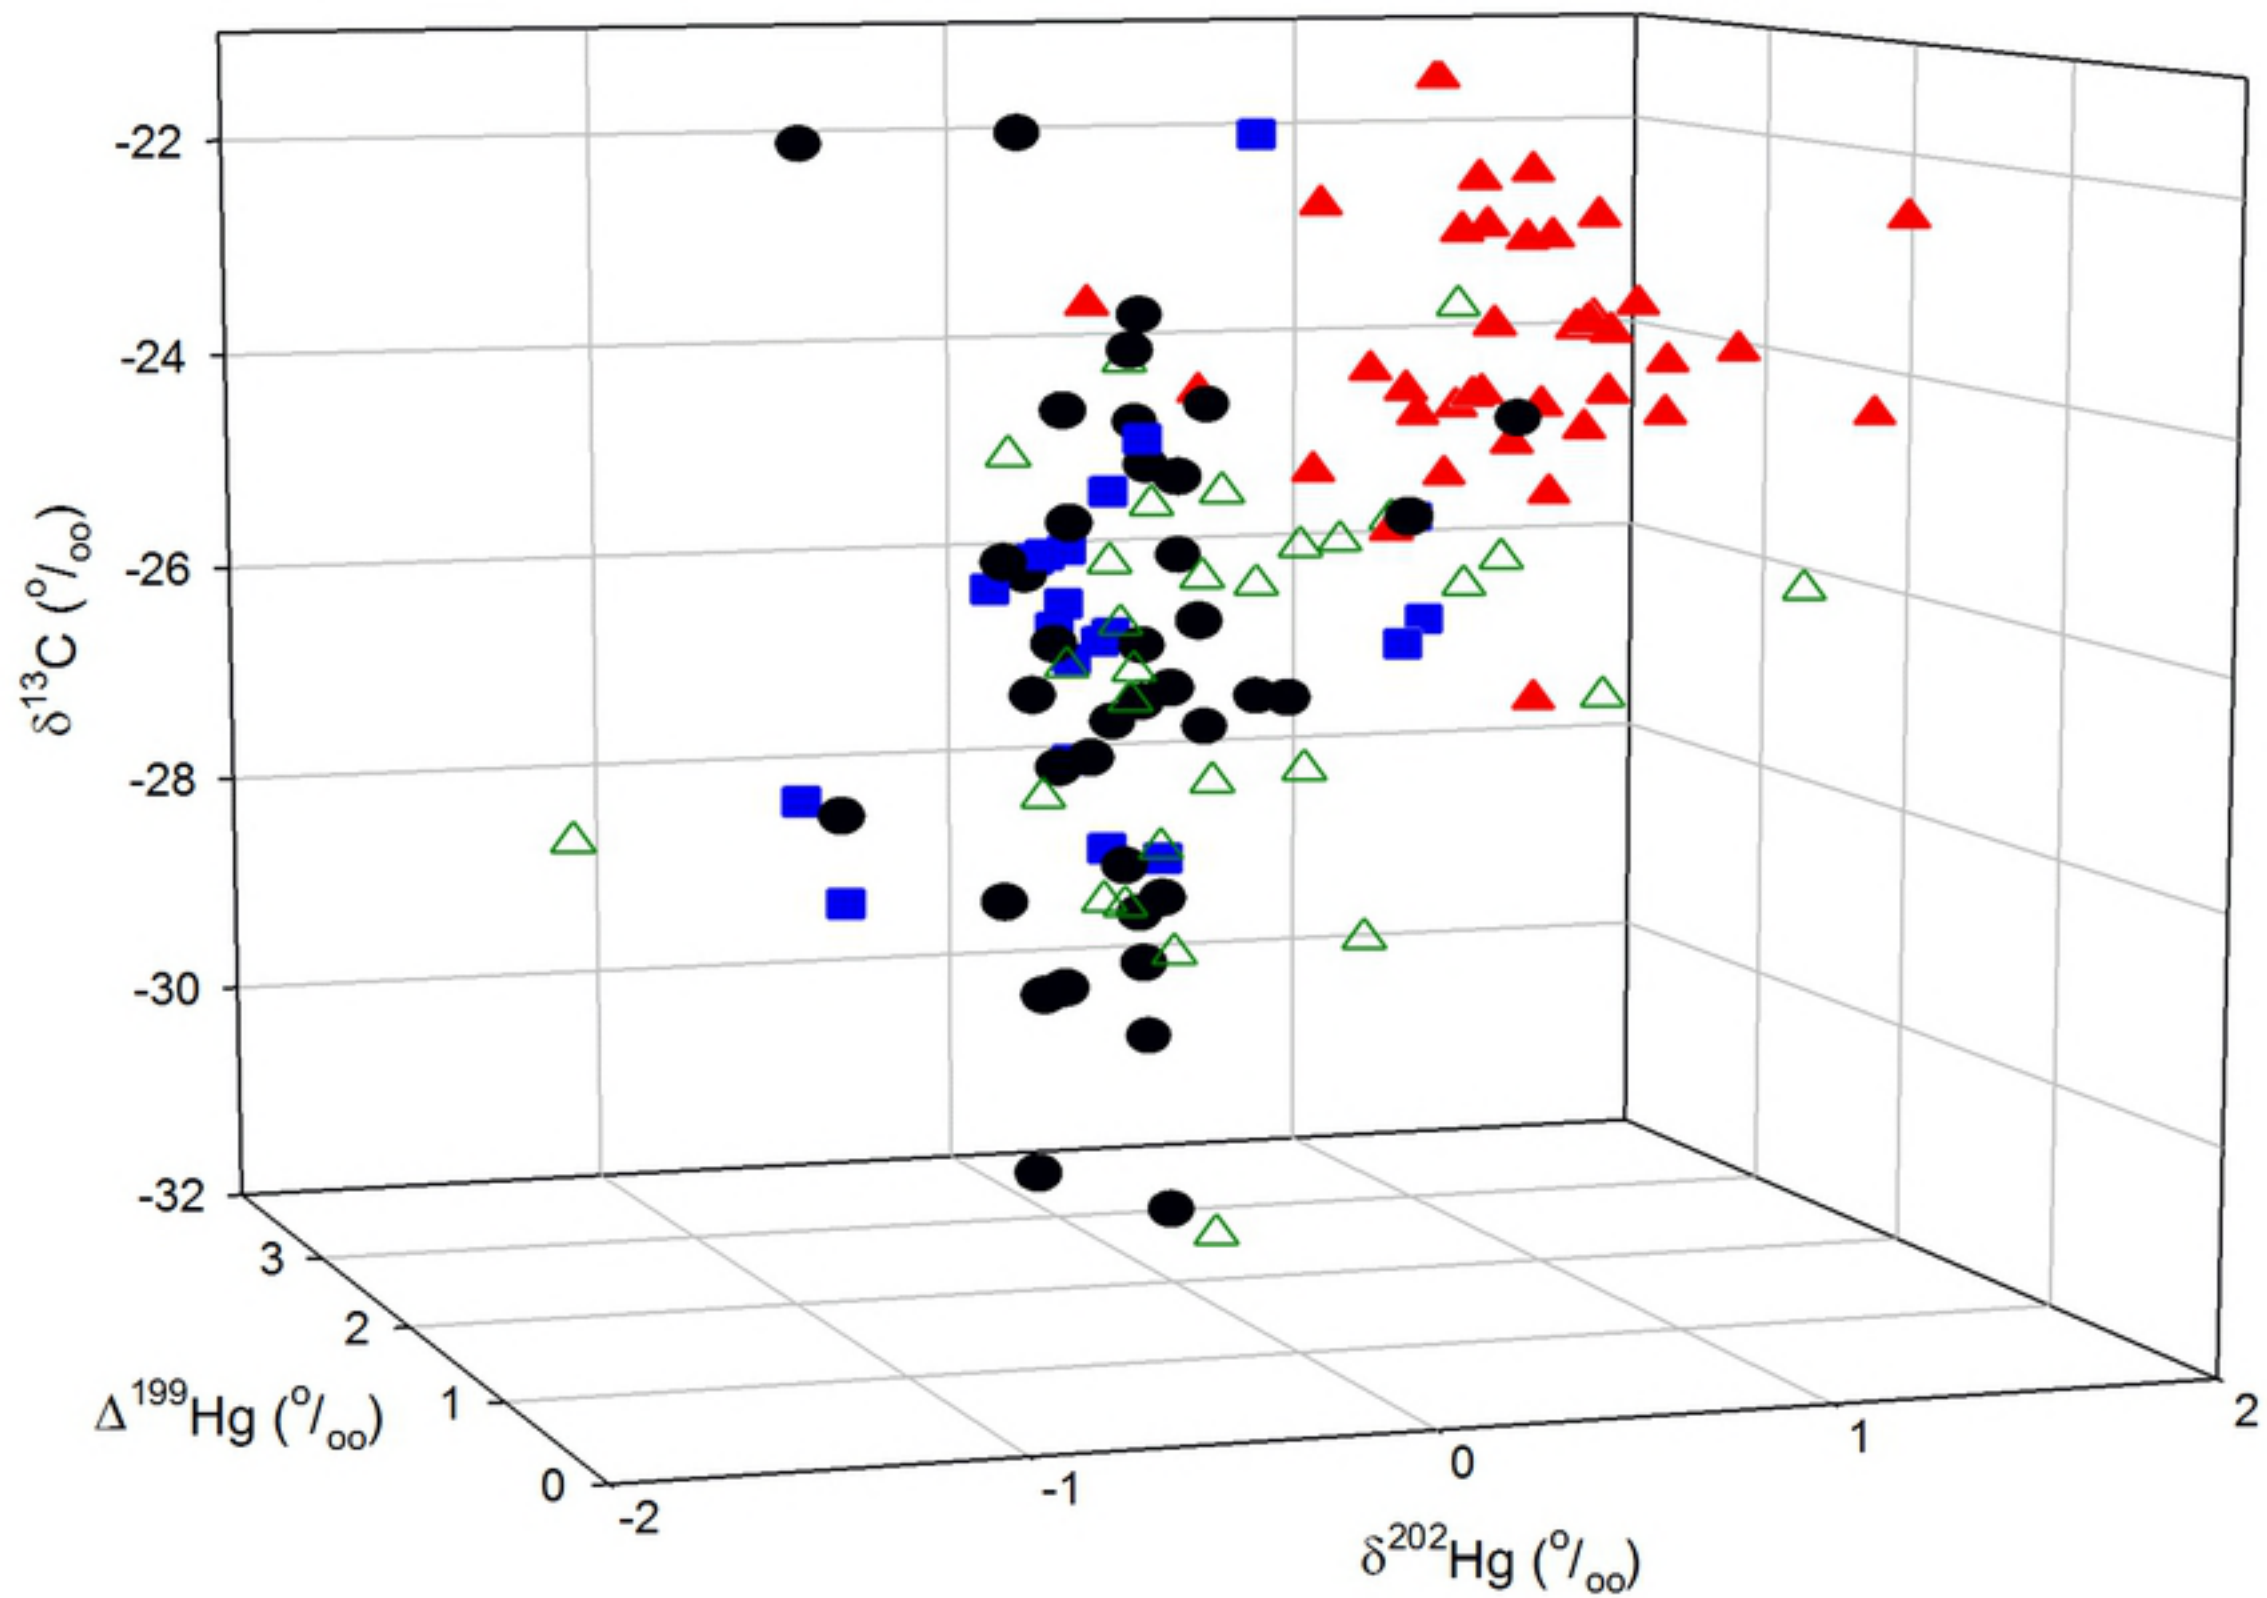

(A)

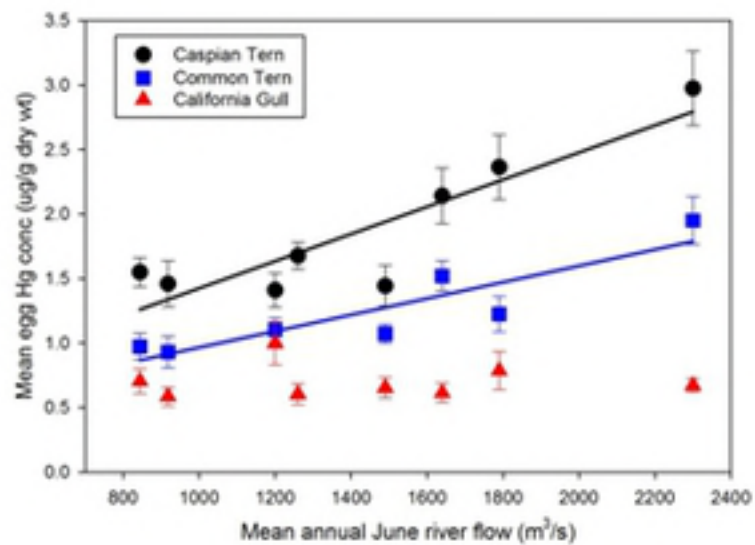

(B)

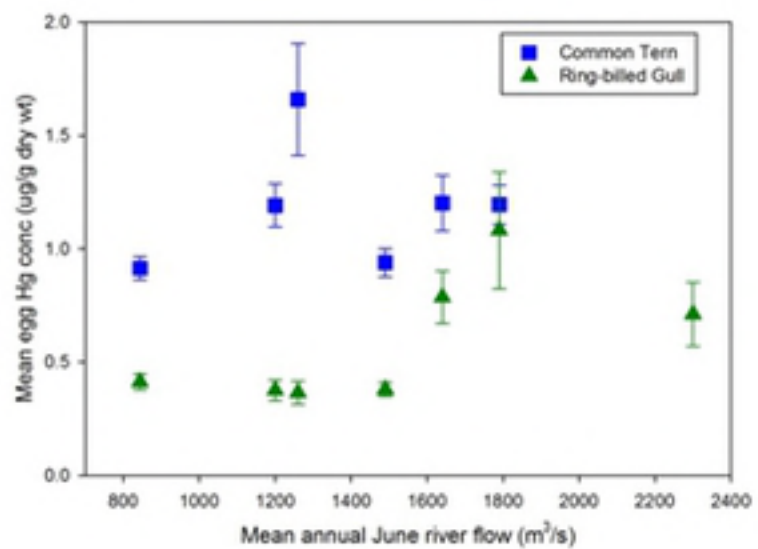

(A) Caspian Tern – Egg Island

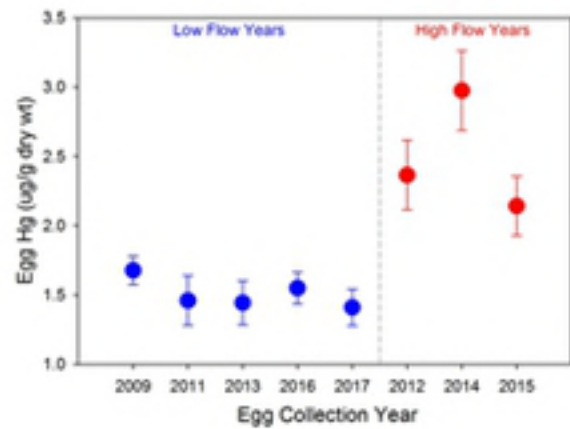

(B) Common Tern – Egg Island

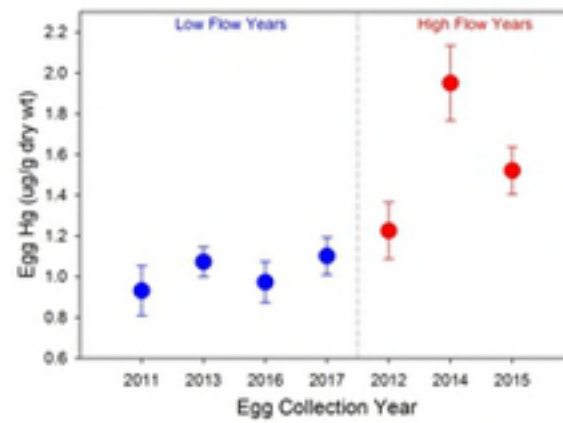

(C) Ring-billed Gull – Mamawi Lake

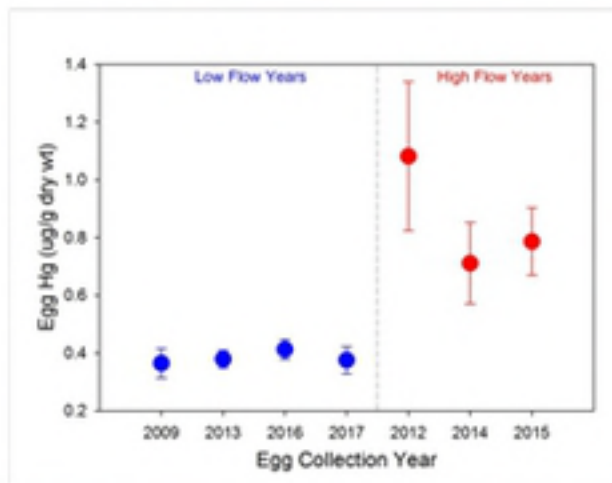

(D) Common Tern – Mamawi Lake

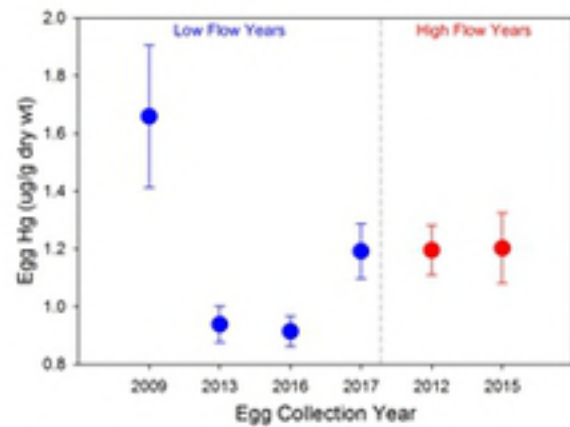

(E) California Gull – Egg Island

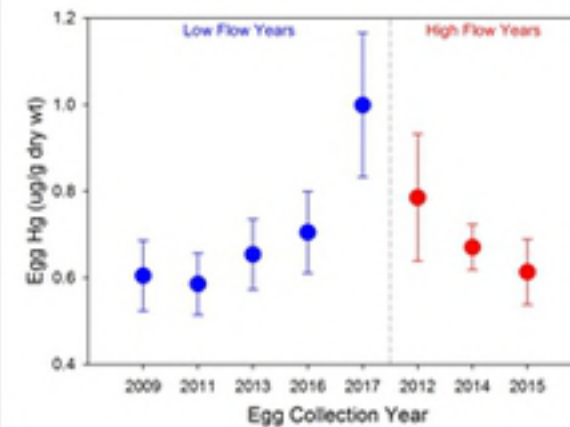



(A)

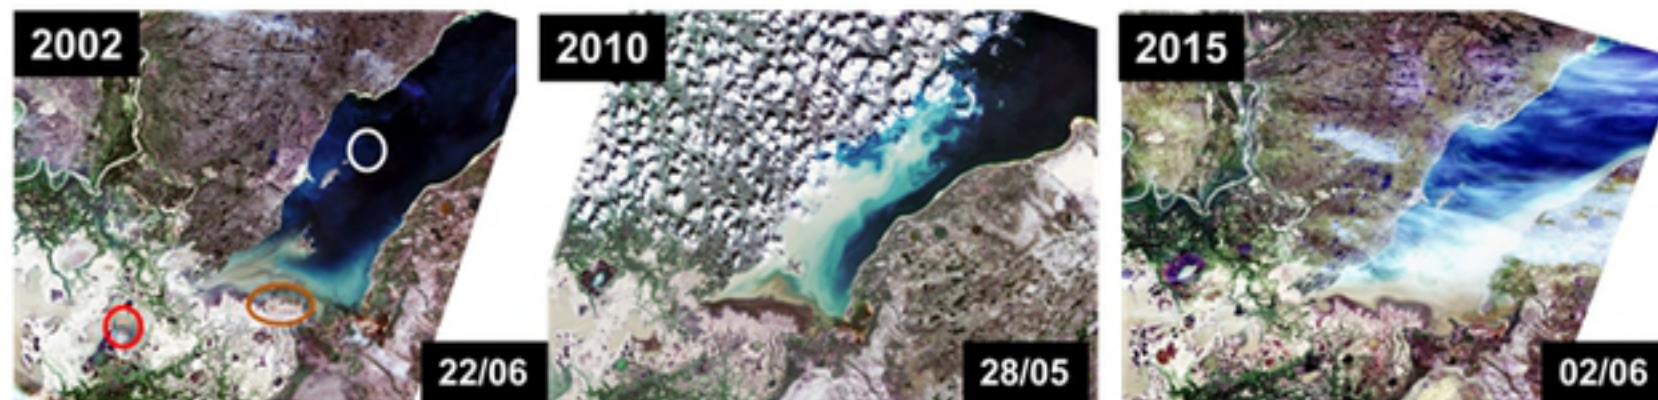

(B)

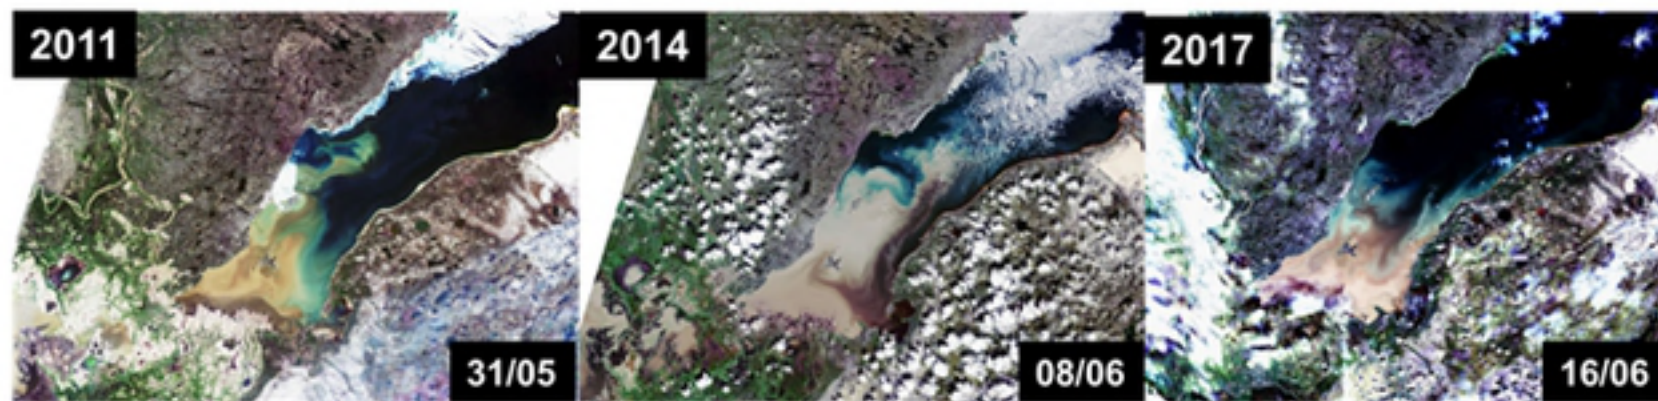

Source: http://biorxiv.org/content/10.1101/440115v1.full.pdf
